# Supplementary material for: Evaluating the necessity of postoperative day 1 labs following laparoscopic radical nephrectomy (LRN)
Source: PubMed Central journal article supplement — Transl Androl Urol. 2024 Nov 28;13(11):2376–83. doi: 10.21037/tau-24-250 (PMC11650348; doi:10.21037/tau-24-250), 2024-11-28
Supplement: tau-13-11-2376-dss.pdf [file tau-13-11-2376-dss.pdf]

## Data Sharing Statement

|                     |                                                                                                                                                     |                                                            |
|---------------------|-----------------------------------------------------------------------------------------------------------------------------------------------------|------------------------------------------------------------|
| <b>Article Info</b> | <a href="https://dx.doi.org/10.21037/tau-24-250">https://dx.doi.org/10.21037/tau-24-250</a>                                                         |                                                            |
| <b>Item</b>         | <b>Question</b>                                                                                                                                     | <b>Authors' Response<br/>(place "-" if not applicable)</b> |
| 1                   | Would you like to share data collected for your study to others?                                                                                    | Yes. Upon request only.                                    |
| 2                   | If not, would you like to share the reason for your decision?                                                                                       | -                                                          |
| 3                   | What data in particular will be shared?                                                                                                             | All data.                                                  |
| 4                   | Any other documents will be shared? Such as study protocol, statistical analysis plan, informed consent form, clinical study report, analytic code. | Yes. Upon request.                                         |
| 5                   | When will data availability begin?                                                                                                                  | When the date of the manuscript is first published.        |
| 6                   | When will data availability end?                                                                                                                    | No limit.                                                  |
| 7                   | To whom will you share the data?                                                                                                                    | To anyone that is interested.                              |
| 8                   | For what type of analysis or purpose?                                                                                                               | To evaluate the necessity of POD1 labs following LRN.      |
| 9                   | How or where can the data/documents be obtained?                                                                                                    | Email the corresponding author:<br>thiel.david@mayo.edu    |
| 10                  | Any other restrictions?                                                                                                                             | -                                                          |
